# Supplementary material for: Round robin study of formalin-fixed paraffin-embedded tissues in mass spectrometry imaging
Source: PubMed Central journal article supplement (PMC6096706; doi:10.1007/s00216-018-1216-2), 2018-07-03
Supplement: 216_2018_1216_MOESM1_ESM.pdf [file 216_2018_1216_MOESM1_ESM.pdf]

**Analytical and Bioanalytical Chemistry**

**Electronic Supplementary Material**

**Round Robin Study of Formalin-Fixed Paraffin-Embedded Tissues in  
Mass Spectrometry Imaging**

Achim Buck, Bram Heijs, Birte Beine, Jan Schepers, Alberto Cassese, Ron M.A. Heeren,

Liam A. McDonnell, Corinna Henkel, Axel Walch, Benjamin Balluff

## Protocol S1: BSA concentration series preparation

1 nmol bovine serum albumin standard (Pierce™ BSA Protein Digest, # 88341, Thermo Fisher) was mixed with 500 µL of a 0.2% trifluoroacetic acid (TFA) solution to a starting concentration of 2 µMolar. Then it was six times continuously diluted 1:1 with 0.2 % TFA. This concentration series was shipped to all partners on dry ice. Each center mixed each dilution 1:1 by with the alpha-cyano-4-hydroxycinnamic acid (CHCA) matrix solution (7 mg/mL CHCA in 50 % ACN/0.2 % TFA). Finally, 2 µL are spotted for each concentration on a previously cleaned AnchorChip target:

|                                |                           | Number of dilution steps and resulting concentration [Molar] |         |          |          |          |          |
|--------------------------------|---------------------------|--------------------------------------------------------------|---------|----------|----------|----------|----------|
| Dilution factor with 0.2 % TFA | Dilution factor with CHCA | 1                                                            | 2       | 3        | 4        | 5        | 6        |
| 2                              | 2                         | 5E-07                                                        | 2.5E-07 | 1.25E-07 | 6.25E-08 | 3.13E-08 | 1.56E-08 |
| Starting conc. [Molar]         | Spotted volume [µL]       | Absolute amount in spotted volume [mol]                      |         |          |          |          |          |
| 0.000002                       | 2                         | 1E-12                                                        | 5E-13   | 2.5E-13  | 1.25E-13 | 6.25E-14 | 3.13E-14 |

## **Protocol S2: BSA data processing**

In order to enable a better comparability, all submitted bovine serum albumin (BSA) spectra were re-processed with the same FlexAnalysis (Bruker Daltonik, Bremen, Germany) method, consisting of the following commands and parameters: UndoAllProcessing; ApplyRawCalibration; faSmooth(Gauss: width=0.02 m/z; cycles=2); faSubtractBaseline (TopHat); faFindPeaks (SNAP: minimum S/N=3; MaximumNumberOfPeaks=300; Averagine).

Then the data underwent a rough internal re-calibration in FlexAnalysis with 1500 ppm mass error tolerance on the following  $m/z$  signals:  $m/z$  927.4934 (BSA peptide),  $m/z$  1554.655 (omni-present mass signal), and  $m/z$  1749.676 (omni-present mass signal).

Finally, the BSA peak detection was performed by looking for 9 BSA peptides ( $m/z$  927.4934, 1163.631, 1283.711, 1305.716, 1479.795, 1567.743, 1639.938, 1880.921, and 2045.028) within a 300 ppm mass error tolerance. The lower limit of detection of each peptide can be then plotted in dependence of the dilution factor, as shown in Figure 2a.

### **Protocol S3: MSI data pre-processing**

For a better comparability of the spectral signals, all metabolite datasets of center 4 underwent recalibration. This was done in a two-step approach by first recalibrating roughly on two matrix peaks ( $m/z$  229.15 and 385.23 with tolerances 7,000 and 5,000 ppm, respectively) and in a second round more precisely (tolerance: 1000 ppm) on three peaks (by adding the lipid peak  $m/z$  888.7). All of this was done in FlexAnalysis (Bruker) in a batch run with the following processing parameters: UndoAllProcessing; ApplyRawCalibration; faFindPeaks (Centroid: RelativeIntensityThreshold=10%; MaximumNumberOfPeaks=30; PeakWidth= $m/z$  0.2; Height=80%); CalibrateInternal.

The peptide dataset of center 1 was recalibrated by copying the calibration constants from one a manually calibrated spectrum to the remaining dataset using the batch function “ReplaceCalibration” of FlexAnalysis (Bruker). The manual calibration was based on 4 peptide signals  $m/z$  842.512 (trypsin),  $m/z$  944.578 (histone H4), and two other peptide signals at  $m/z$  1551.846 and 2141.188.

**Table S1: Chemicals**

|                                                 | <b>Center 1</b>                                                                       | <b>Center 2</b>                                                                 | <b>Center 3</b>                                                                 | <b>Center 4</b>                                                                 |
|-------------------------------------------------|---------------------------------------------------------------------------------------|---------------------------------------------------------------------------------|---------------------------------------------------------------------------------|---------------------------------------------------------------------------------|
| Xylene                                          | Xylene, 99%,<br>Carl Roth #9713                                                       | Roth, Xylol<br>(Isomere), ≥98,5<br>%, Ph.Helv.,<br>#CN80.2                      | Xylene<br>Histograde, J.T.<br>Baker #3410                                       | Honeywell<br>Xylenes, 99%,<br>#16446                                            |
| 9-aminoacridine<br>hydrochloride<br>monohydrate | 9-Aminoacridine<br>hydrochloride<br>monohydrate,<br>98%, Sigma-<br>Aldrich<br>#A38401 | 9-Aminoacridine<br>hydrochloride<br>monohydrate,<br>98%, Aldrich<br>#A38401     | 9-Aminoacridine<br>hydrochloride<br>monohydrate,<br>98%, Aldrich<br>#A38401     | 9-Aminoacridine<br>hydrochloride<br>monohydrate,<br>98%, Aldrich<br>#A38401     |
| Citric acid                                     | Citric acid,<br>99.0%, Sigma-<br>Aldrich #C0759                                       | Citric acid<br>monohydrate,<br>ACS reagent,<br>≥99.0%, Sigma-<br>Aldrich #C1909 | Citric acid<br>monohydrate,<br>ACS reagent,<br>≥99.0%, Sigma-<br>Aldrich #C1909 | Citric acid<br>monohydrate,<br>ACS reagent,<br>≥99.0%, Sigma-<br>Aldrich #C1909 |
| Trypsin                                         | Trypsin Gold,<br>mass<br>spectrometry<br>grade, Promega<br>#V5280                     | Trypsin Gold,<br>mass<br>spectrometry<br>grade, Promega<br>#V5280               | Trypsin Gold,<br>mass<br>spectrometry<br>grade, Promega<br>#V5280               | Trypsin Gold,<br>mass<br>spectrometry<br>grade, Promega<br>#V5280               |
| alpha-Cyano-4-<br>hydroxycinnamic<br>acid       | α-Cyano-4-<br>hydroxycinnamic<br>acid, ≥99%,<br>Sigma-Aldrich<br>#70990               | α-Cyano-4-<br>hydroxycinnamic<br>acid, Bruker<br>#201344                        | α-Cyano-4-<br>hydroxycinnamic<br>acid, ≥98%,<br>Aldrich #476870                 | α-Cyano-4-<br>hydroxycinnamic<br>acid, ≥98%,<br>Sigma-Aldrich<br>#C2020         |
| Trifluoroacetic<br>acid                         | Trifluoroacetic<br>acid, HPLC<br>grade, Applied<br>Biosystems<br>#400445              | AlfaAesar,<br>Trifluoroacetic<br>acid, HPLC<br>grade, 99,5+%,<br>#44630         | Trifluoroacetic<br>acid, LC-MS<br>Ultra, Fluka<br>#14264-2ML                    | Trifluoroacetic<br>acid, HPLC<br>grade, ≥99.0%,<br>Sigma-Aldrich<br>#302031-M   |

**Table S2:** mMass peak picking parameters

|                         |                                  |                                | <b>Peptide average spectrum</b> | <b>Metabolite average spectrum</b> |
|-------------------------|----------------------------------|--------------------------------|---------------------------------|------------------------------------|
| <b>SCiLS parameters</b> |                                  |                                |                                 |                                    |
|                         | Normalization                    |                                | <b>TIC</b>                      | <b>RMS and TIC</b>                 |
|                         | Mass window                      |                                | 200 ppm                         | 0.15 Da                            |
| <b>mMass parameters</b> |                                  |                                |                                 |                                    |
|                         | Baseline correction              | Precision                      | 35                              | 35                                 |
|                         |                                  | Relative offset                | 0                               | 0                                  |
|                         | Smoothing                        | Method                         | -                               | Savitzky-Golay                     |
|                         |                                  | Window                         | -                               | 0.2                                |
|                         |                                  | Cycles                         | -                               | 2                                  |
|                         | Peak picking                     | S/N                            | 3                               | 5                                  |
|                         |                                  | Picking height                 | 77                              | 100                                |
|                         | De-isotoping                     | Max. charge                    | 1                               | 1                                  |
|                         |                                  | Isotope mass tolerance         | 0.2                             | 0.2                                |
|                         |                                  | Isotope intensity tolerance    | 50                              | 50                                 |
|                         | Peak picking results             | Number of peaks                | 169                             | 201 and 192                        |
| <b>R mass filtering</b> |                                  | Trypsin autolysis peak         | $m/z$ 842.5                     | -                                  |
|                         | Reference masses                 | [9-aminoacridine matrix + Cl]- | -                               | $m/z$ 229.1                        |
|                         | Pearson correlation coefficients | Minimum correlation            | 0.75                            | 0.75                               |
|                         | Clean-up results                 | Number of peaks                | 165                             | 194 and 189                        |

**Table S3:** Overview of data analysis types

|                                       |                             | <b>Analysis type</b>                                                                                       |                                                         |
|---------------------------------------|-----------------------------|------------------------------------------------------------------------------------------------------------|---------------------------------------------------------|
|                                       |                             | <b>Relative</b> (each center with <b>own</b> intensity scale)                                              | <b>Absolute</b> (centers <b>share</b> intensity scales) |
| <b>Number of m/z species involved</b> | <b>1 (univariate)</b>       | Pearson correlation analysis of visualization patterns between tissues (Fig. 4a,b)                         | Coefficient of Variation analysis (Fig. 3b)             |
|                                       |                             | Comparison of peak lists after statistical testing between tissues (Fig. 5a,b)                             | Threshold based classifier: CART (Fig. 5a,b)            |
|                                       | <b>&gt;1 (multivariate)</b> | Pearson correlation analysis of molecular patterns within tissues across experiments and centers (Fig. 4c) | Principal Component Analysis (Fig. 2b,c)                |
|                                       |                             |                                                                                                            | Classification: Random Forest (Fig. 5c,d,e,f)           |

**Table S4:** References on non-LC/MS ring trials

| Publication title                                                                                                                                                                                                                                                         | Reference                                                       | Technology     | Number of centers | Number of replicates                 |
|---------------------------------------------------------------------------------------------------------------------------------------------------------------------------------------------------------------------------------------------------------------------------|-----------------------------------------------------------------|----------------|-------------------|--------------------------------------|
| Multicenter Matrix-Assisted Laser Desorption Ionization–Time of Flight Mass Spectrometry Study for Identification of Clinically Relevant <i>Nocardia spp</i>                                                                                                              | Blosser SJ et al., J Clin Microbiol. 2016 May; 54(5): 1251–1258 | MALDI Biotyper | 3                 | On average 28.3 repeated extractions |
| A multi-center ring trial for the identification of anaerobic bacteria using MALDI-TOF MS                                                                                                                                                                                 | Veloo ACM et al., Anaerobe. 2017 Dec;48:94-97                   | MALDI Biotyper | 7                 | Not reported                         |
| Multicenter Evaluation of the Bruker MALDI Biotyper CA System for the Identification of Clinically Important Bacteria and Yeasts                                                                                                                                          | Wilson DA et al., Am J Clin Pathol. 2017 Jun 1;147(6):623-631   | MALDI Biotyper | 6                 | Maximum 10                           |
| Multicenter Evaluation of the Bruker MALDI Biotyper CA System for the Identification of Clinical Aerobic Gram-Negative Bacterial Isolates                                                                                                                                 | Faron ML et al., PLoS One. 2015 Nov 3;10(11):e0141350           | MALDI Biotyper | 5                 | Repeated only if score was too low   |
| Repeatability and reproducibility of desorption electrospray ionization-mass spectrometry (DESI-MS) for the imaging analysis of human cancer tissue: a gateway for clinical applications                                                                                  | Abbassi-Ghadi N et al., Analytical Methods. 2015;7(1):71-80     | DESI           | 2                 | 4                                    |
| Analysis of Human Proteome Organization Plasma Proteome Project (HUPO PPP) reference specimens using surface enhanced laser desorption/ionization-time of flight (SELDI-TOF) mass spectrometry: Multi-institution correlation of spectra and identification of biomarkers | Rai AJ et al., Proteomics 2005, 5, 3467–3474                    | SELDI          | 5                 | Minimum 2                            |
